# Supplementary material for: Increased Incidence and Associated Risk Factors of Aspergillosis in Patients with Bronchiectasis
Source: MDPI journal article supplement (doi:10.3390/jpm11050422), 2021-05-17
Supplement: s1 [file s1]

**Supplementary Table S1.** Sensitivity analyses using different washout periods. Subdistribution hazard ratios of aspergillosis in the bronchiectasis cohort relative to the matched cohort

| Washout period | Subdistribution hazard ratio (95% confidence interval) |
|----------------|--------------------------------------------------------|
| 1 year         | 5.03 (3.30–7.66)                                       |
| 2 year         | 4.94 (3.16–7.71)                                       |
| 3 year         | 4.94 (3.02–8.08)                                       |

**Supplementary Table S2.** Specific diagnostic codes for aspergillosis in the bronchiectasis cohort and the matched cohort

|                                                             | Bronchiectasis cohort<br>(n = 51) | Matched cohort<br>(n = 45) |
|-------------------------------------------------------------|-----------------------------------|----------------------------|
| Other pulmonary aspergillosis*                              | 22                                | 17                         |
| Aspergillosis, unspecified or other forms of aspergillosis* | 25                                | 24                         |
| Disseminated aspergillosis or invasive aspergillosis*       | 9                                 | 9                          |

\*Some patients had more than one disease diagnosis code.
